# Supplementary material for: El Ciudadano y el Hombre de Bien en la Filosofía de Aristóteles
Source: Royal Society of Chemistry journal article supplement (doi:10.1039/c9ra00745h), 1984-01-01
Supplement: c9ra00745h1.pdf [file c9ra00745h1.pdf]

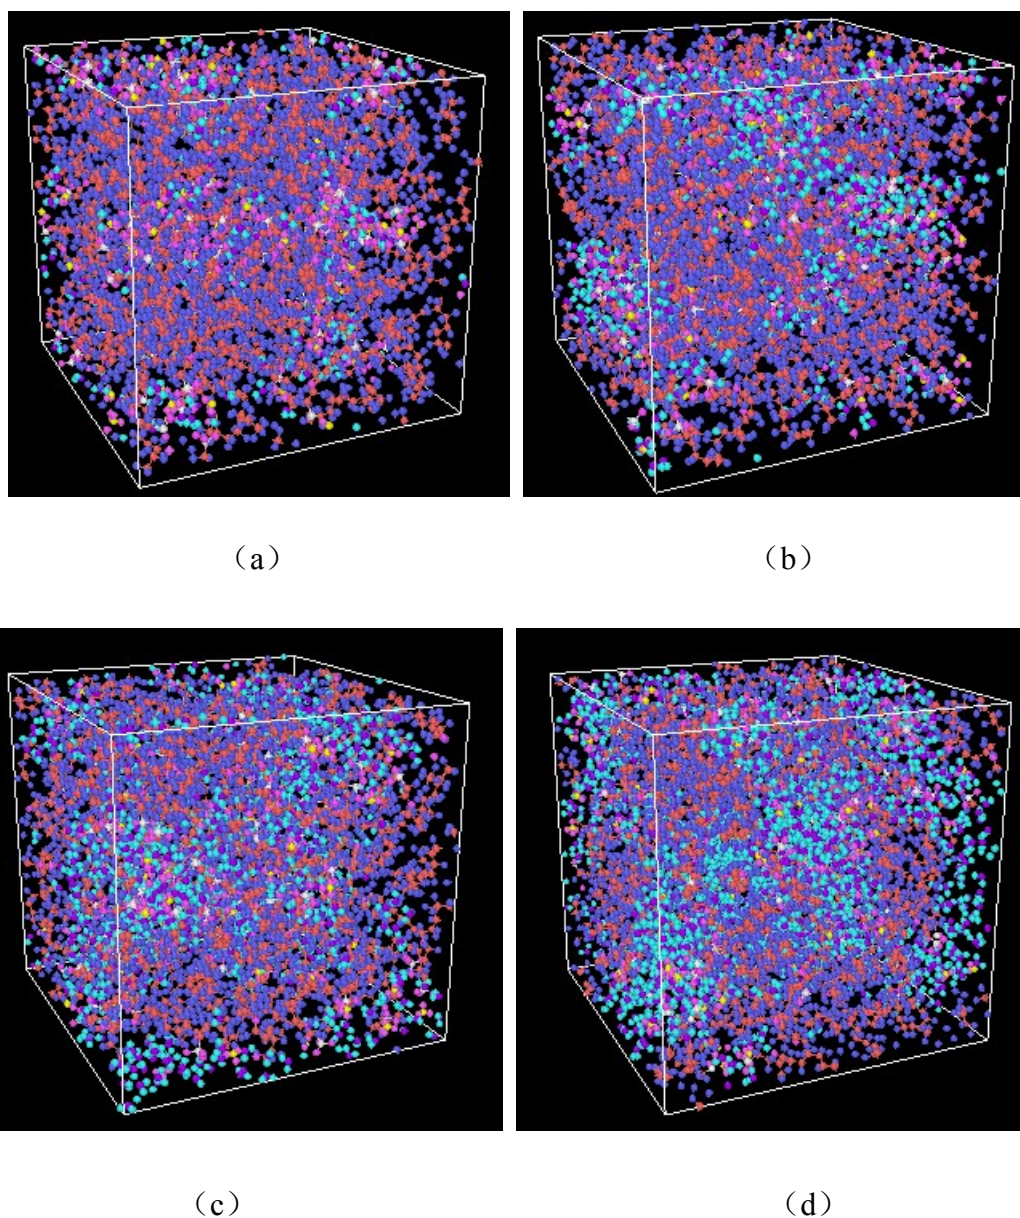

Figure The swelling structure of Aquivion polymer at a hydration level of (a)  $\lambda=3$  (b)  $\lambda=6$  (c)  $\lambda=9$ , and (d)  $\lambda=14$  (■C, ■F, ■O (between C atoms in side chain), ■S, ■O ( $\text{SO}_3^-$ ), ■H( $\text{H}_3\text{O}^+$ ), ■O( $\text{H}_2\text{O}$ ), ■H( $\text{H}_2\text{O}$ )).

The results of this paper can provide a mechanism explanation for swelling and mechanical behavior of PFSA polymer membranes
